# Supplementary material for: Telomeric Repeats Facilitate CENP-ACnp1 Incorporation via Telomere Binding Proteins
Source: PubMed Central journal article supplement (PMC3729655; doi:10.1371/journal.pone.0069673), 2013-07-31

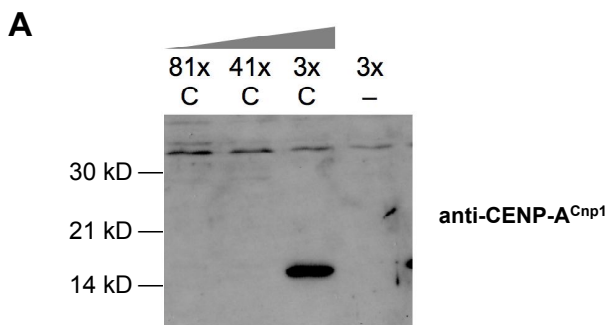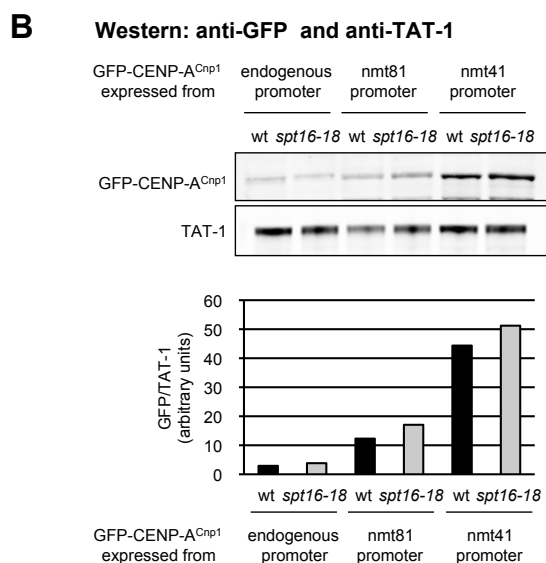

**Figure S1. CENP-A<sup>Cnp1</sup> overexpression in *S. pombe* cells.**

**(A)** CENP-A<sup>Cnp1</sup> can be detected when overexpressed from the *nmt1* promoter. Adapted from Castillo et al., 2007 (Figure S3). Western analyses of extracts from wildtype cells overexpressing CENP-A<sup>Cnp1</sup> from *nmt81* (81xC), *nmt41* (41xC) or *nmt1* (3xC) promoter to give low, medium and high expression levels compared with cells containing endogenous levels (3x). **(B)** Western analysis of GFP-CENP-A<sup>Cnp1</sup> levels in wt and *spt16-18* cells. From Choi et al., 2012 (Figure 1D). Western analysis of GFP-CENP-A<sup>Cnp1</sup> levels in wt and *spt16-18* cells expressing GFP-CENP-A<sup>Cnp1</sup> under endogenous, *nmt81* or *nmt41* promoter (upper panel). The intensities of GFP-CENP-A<sup>Cnp1</sup> and TAT-1 (alpha-tubulin) signals were measured using LICOR Odyssey Infrared Imaging System software (Li-COR Bioscience) and the relative intensities of GFP-CENP-A<sup>Cnp1</sup>/TAT-1 were quantified (bottom panel). GFP-CENP-A<sup>Cnp1</sup> was expressed for 24 h at 25°C before harvest. **(C)** Comparison of CENP-A<sup>Cnp1</sup> localisation in cells expressing CENP-A<sup>Cnp1</sup> from different strengths of *nmt* promoter. Immunolocalization of CENP-A<sup>Cnp1</sup> in cells expressing endogenous levels of CENP-A<sup>Cnp1</sup> or extra CENP-A<sup>Cnp1</sup> expressed from the *nmt81*, *nmt41* or *nmt1* promoters. Cells were grown in the absence of thiamine for 24 h at 36°C and stained with anti-CENP-A<sup>Cnp1</sup> antibody (green) and DAPI (DNA: red). Images are displayed to indicate the relative signal intensity in cells expressing CENP-A<sup>Cnp1</sup> from the four different promoters. Images have not been autoscaled. The images for endogenous (Endog.) and *nmt81* promoters therefore appear very faint compared to *nmt1*. Scale bar, 5 mm.

Figure S1

C

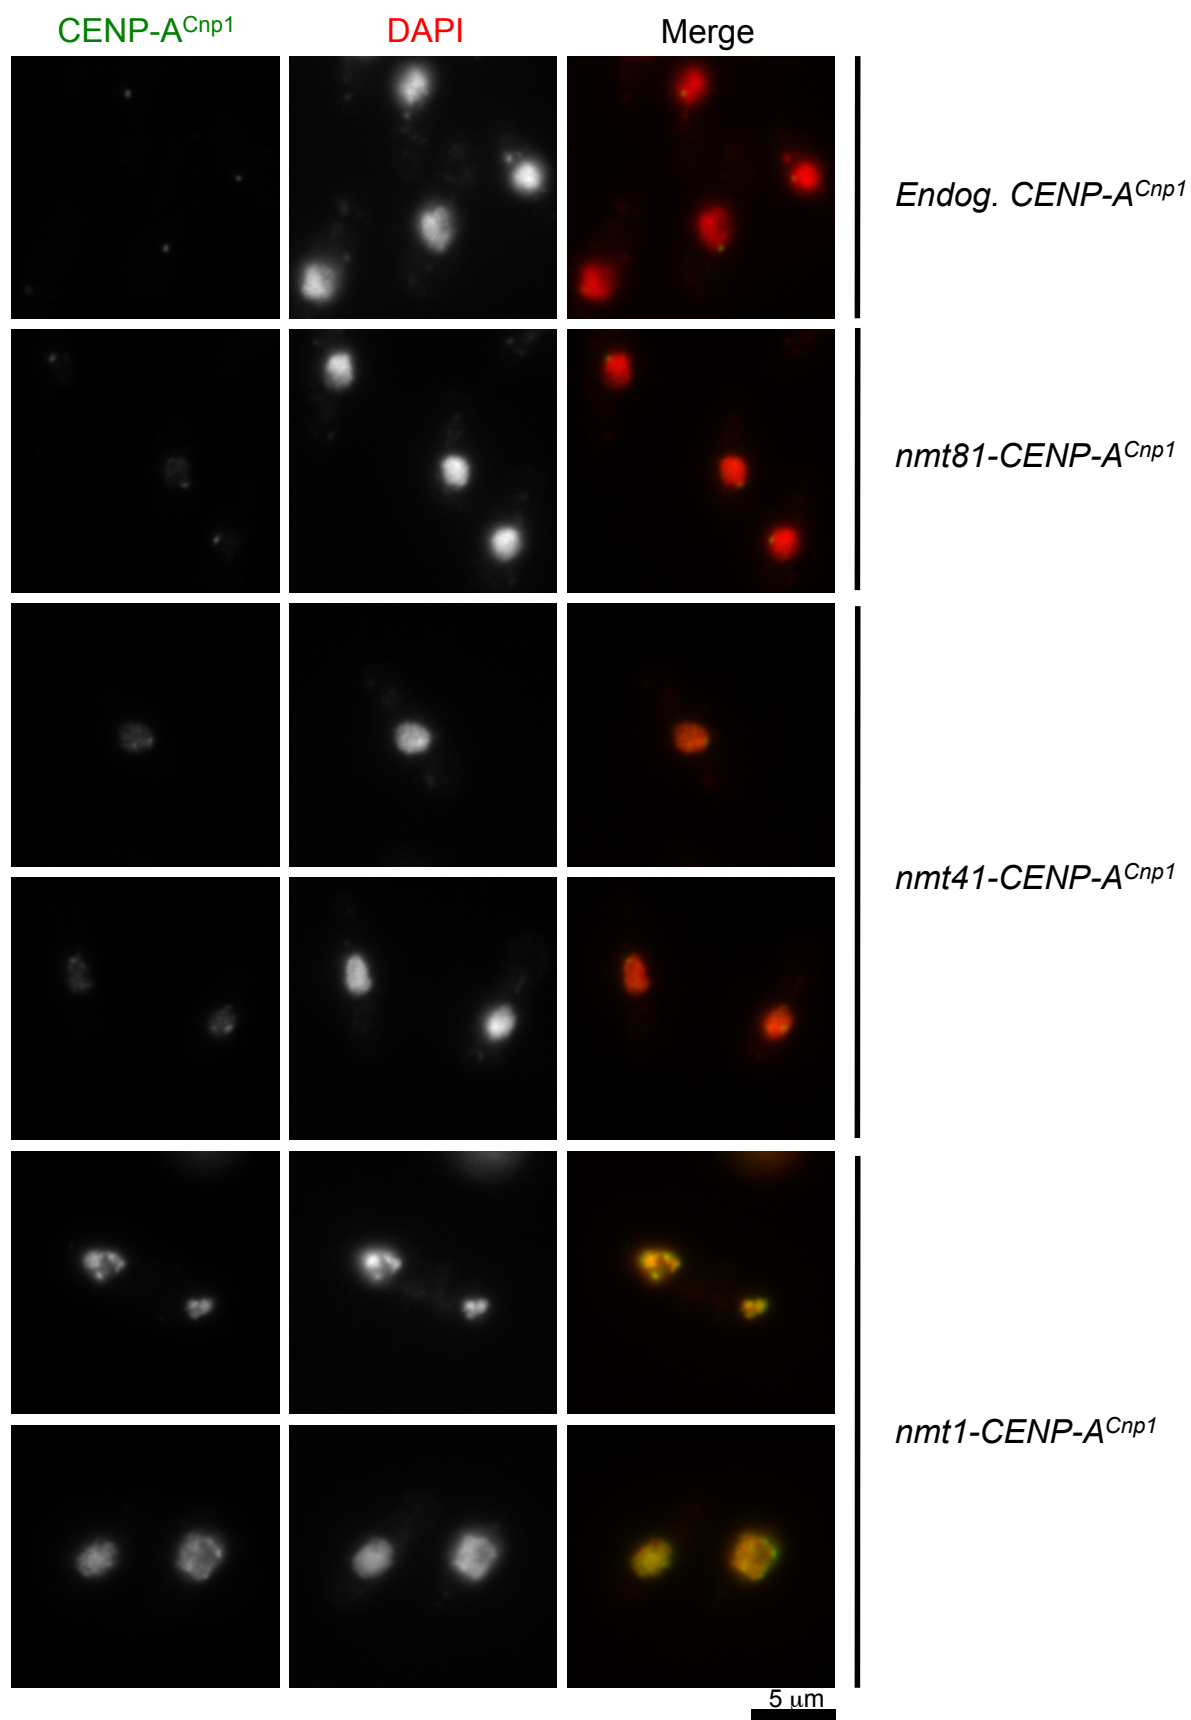

Supplement: pone.0069673.s001.pdf [file pone.0069673.s001.pdf]
