# Supplementary material for: Telomeric Repeats Facilitate CENP-ACnp1 Incorporation via Telomere Binding Proteins
Source: PubMed Central journal article supplement (PMC3729655; doi:10.1371/journal.pone.0069673), 2013-07-31
Supplement: pone.0069673.s002.pdf [file pone.0069673.s002.pdf]

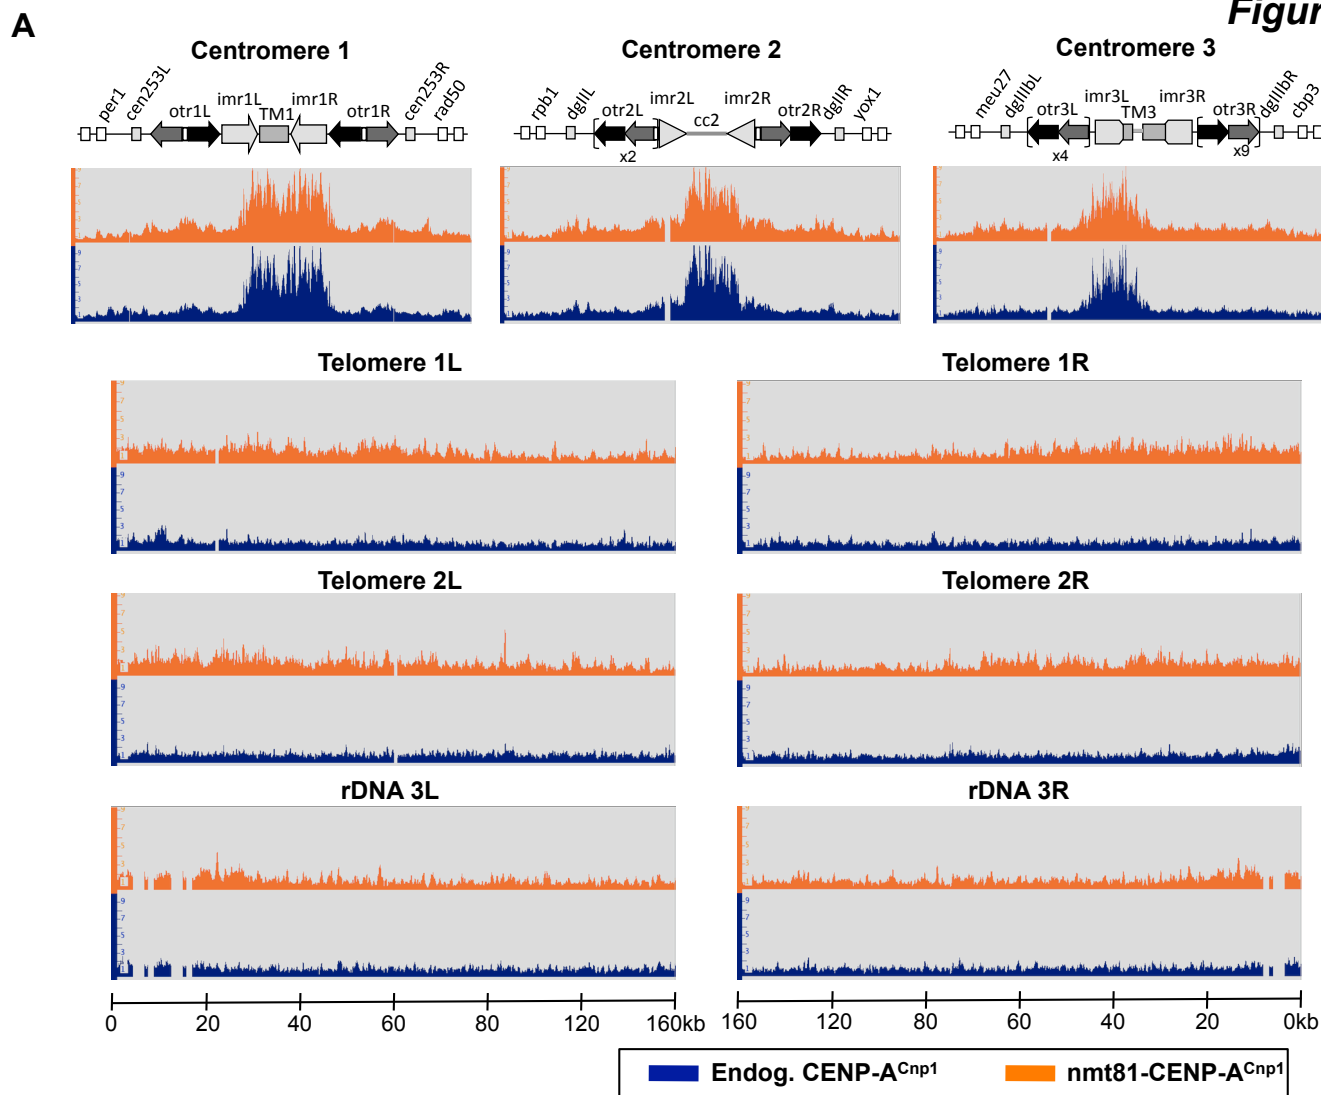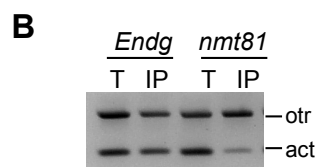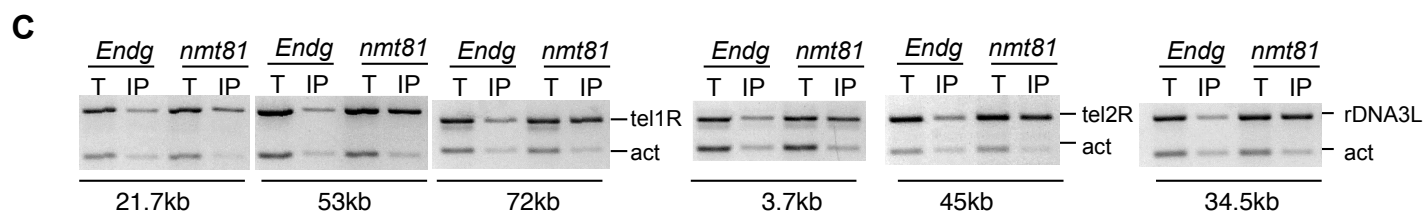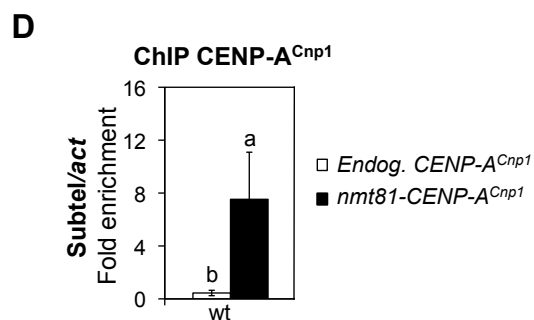

**Figure S2. Additional CENP-A<sup>Cnp1</sup> accumulates at subtelomeric and pericentromeric regions.**

**(A)** Genome browser view showing ChIP- chip occupancy profiles for wild-type (Endog.) levels in blue or additional CENP-A<sup>Cnp1</sup> levels in orange (*nmt81-CENP-A<sup>Cnp1</sup>*) at centromeres, pericentromeric outer repeats (x2, x4, x9 indicate the number of repetitive elements) or subtelomeric / rDNA-adjacent regions. Data on the Y-axis are presented in linear scale and X-axis shows genome positions (distance from the chromosome end at telomeres and rDNA loci is indicated in kb). ChIP-PCR analysis of CENP-A<sup>Cnp1</sup> association with pericentromeric outer repeats **(B)** or subtelomeric / rDNA-adjacent regions **(C)** expressing wild-type (Endog.) or additional (*nmt81*) levels of CENP-A<sup>Cnp1</sup>. Enrichment of pericentromeric outer repeats (A, *otr* primers), telomeric (B, primers reside 21.7 kb, 53 kb and 72 kb from the left telomere of chromosome I and 3.7 kb and 47.9 kb from the right end of chromosome II) and rDNA adjacent regions (primers reside 34.5 kb from the rDNA repeats on left arm of chromosome III) was assessed compared to actin (*act*) in immunoprecipitated (IP) relative to total (T) extract. **(D)** ChIP-qPCR analysis of CENP-A<sup>Cnp1</sup> association with a subtelomeric region from the right telomere of chromosome I (53 kb from the end) expressing wild-type (Endog.) or additional (*nmt81-CENP-A<sup>Cnp1</sup>*) levels of CENP-A<sup>Cnp1</sup>. Enrichment on the sub-telomeric region was normalized to the signal obtained for the euchromatic gene encoding actin (*act1+*). Error bars indicate S.D. from 3 biological replicates. Mean values marked with different letter (a or b) indicate results significantly different from each other, as established by One Way ANOVA and Holm-Sidak test for multiple comparison (P<0.01).
