# Supplementary material for: Telomeric Repeats Facilitate CENP-ACnp1 Incorporation via Telomere Binding Proteins
Source: PubMed Central journal article supplement (PMC3729655; doi:10.1371/journal.pone.0069673), 2013-07-31
Supplement: pone.0069673.s003.pdf [file pone.0069673.s003.pdf]

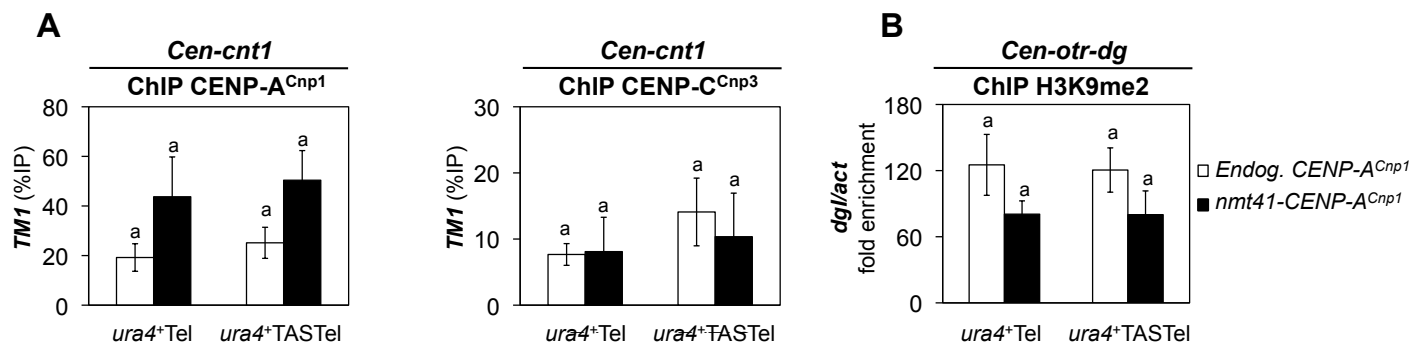

**Figure S3. Enrichment of CENP-A<sup>Cnp1</sup>, CENP-C<sup>Cnp3</sup> and H3K9me2 at centromeres in wild-type cells carrying Ch16 minichromosome derivatives**

**(A)** CHIP-qPCR of CENP-A<sup>Cnp1</sup> and CENP-C<sup>Cnp3</sup> levels at *TM1* in cells containing the *ura4*<sup>+</sup>-Tel or *ura4*<sup>+</sup>-TAS-Tel Ch16 minichromosomes and expressing endogenous (Endog. CENP-A<sup>Cnp1</sup>) or additional (*nmt41*-CENP-A<sup>Cnp1</sup>) levels of CENP-A<sup>Cnp1</sup>. Enrichment is reported as the percentage of immunoprecipitated chromatin (%IP). Error bars indicate S.D. from 3 biological replicates. **(B)** CHIP-qPCR of H3K9me2 levels on centromeric *otr dgI* repeats in the same cells as in **A**. Enrichment on *dgI* was normalized to the signal obtained for the gene encoding actin (*act1*<sup>+</sup>). Error bars indicate S.D. from 3 biological replicates. Mean values marked with the same letter (a) indicate results not significantly different from each other, as established by One Way ANOVA and Holm-Sidak test for multiple comparison ( $P < 0.01$ ).
