# Supplementary material for: Telomeric Repeats Facilitate CENP-ACnp1 Incorporation via Telomere Binding Proteins
Source: PubMed Central journal article supplement (PMC3729655; doi:10.1371/journal.pone.0069673), 2013-07-31
Supplement: pone.0069673.s004.pdf [file pone.0069673.s004.pdf]

**Figure S4**

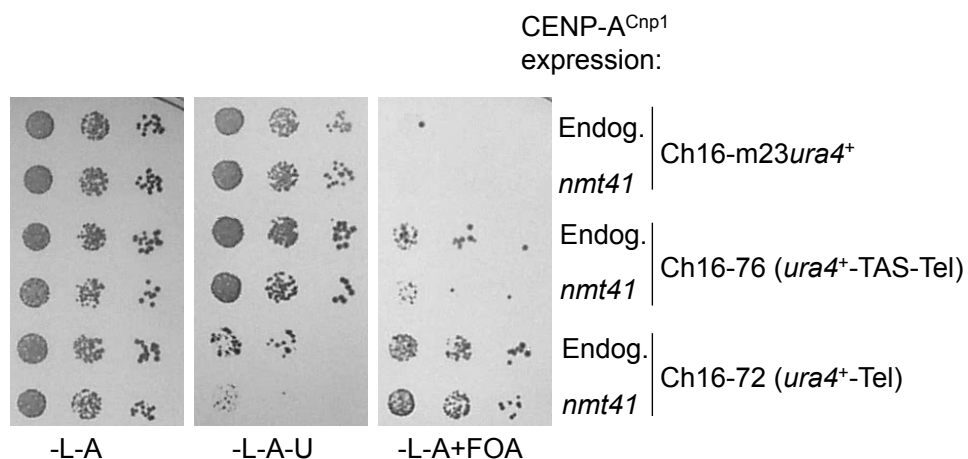

**Figure S4. Increased CENP-A<sup>Cnp1</sup> levels enhance silencing of a *ura4*<sup>+</sup> gene placed adjacent to telomeres.**

Serial dilution growth assay of wild-type cells expressing wild-type levels (Endog.) or moderate levels of additional CENP-A<sup>Cnp1</sup> (*nmt41*-CENP-A<sup>Cnp1</sup>) grown at 36°C for three days. Cells containing the m23:*ura4*<sup>+</sup> (*ura4*<sup>+</sup> inserted 50 kb from the left telomere of Ch16), *ura4*<sup>+</sup>-Tel or *ura4*<sup>+</sup>-TAS-Tel Ch16 minichromosomes were plated on the indicated media: no leucine, adenine or no uracil, or with counter-selective 5-FOA added.
