# Supplementary material for: Telomeric Repeats Facilitate CENP-ACnp1 Incorporation via Telomere Binding Proteins
Source: PubMed Central journal article supplement (PMC3729655; doi:10.1371/journal.pone.0069673), 2013-07-31
Supplement: pone.0069673.s005.pdf [file pone.0069673.s005.pdf]

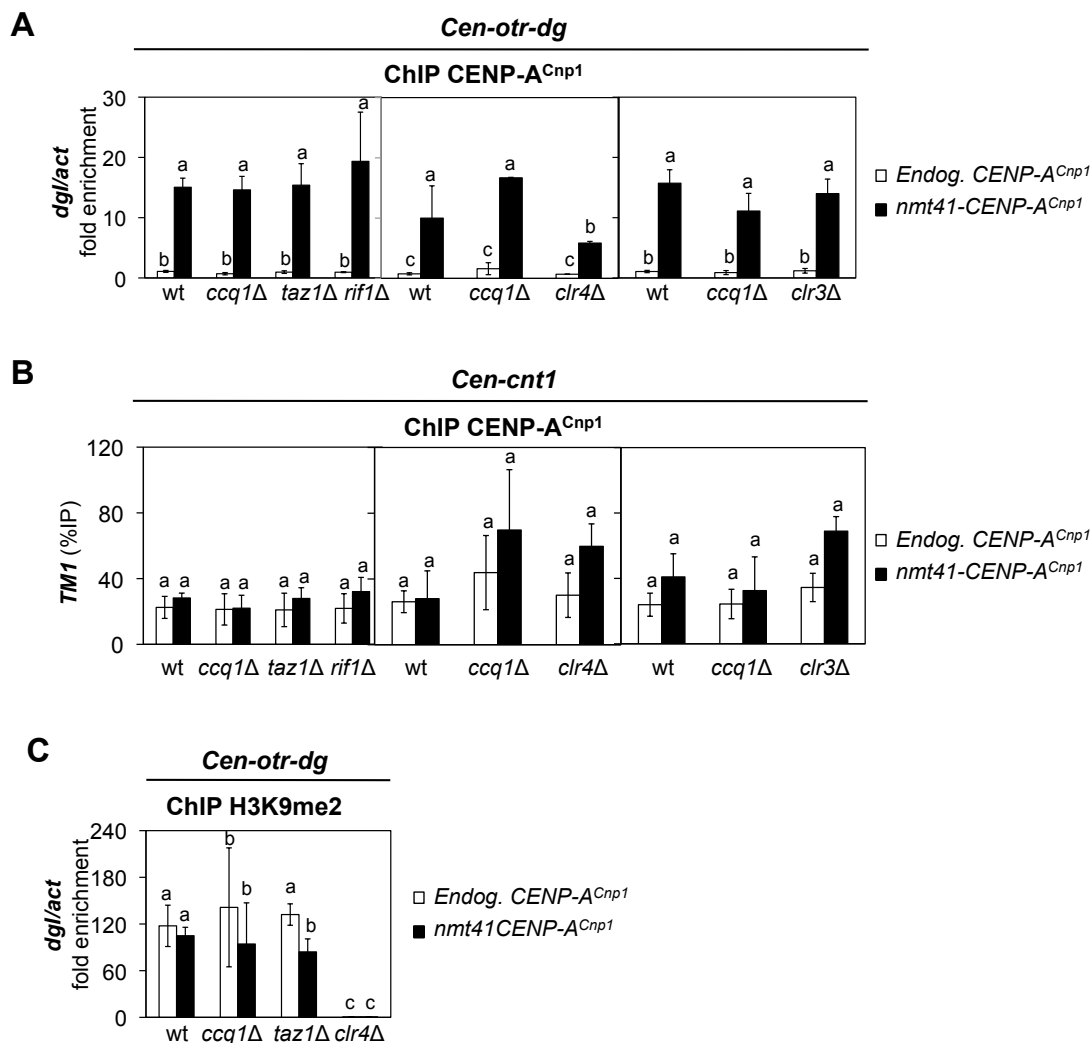

**Figure S5. Enrichment of CENP-A<sup>Cnp1</sup>, CENP-C<sup>Cnp3</sup> and H3K9me2 at centromeres in wild-type and mutant cells carrying the Ch16 *ura4+*-Tel minichromosome derivatives.**

ChIP-qPCR of CENP-A<sup>Cnp1</sup> levels on centromeric *otr dg1* repeats (**A**) and at TM1 in the central region of centromere 1 (**B**) in wild-type (wt) and mutant cells (*ccq1*Δ, *taz1*Δ, *rif1*Δ, *clr4*Δ and *clr3*Δ) carrying the Ch16-72 (*ura4+*-Tel) minichromosome and expressing endogenous (Endog. CENP-A<sup>Cnp1</sup>) or additional (*nmt41*-CENP-A<sup>Cnp1</sup>) CENP-A<sup>Cnp1</sup> levels. (**C**) ChIP-qPCR of H3K9me2 levels on centromeric *otr dg1* repeats in wild-type (wt) and mutant cells (*ccq1*Δ, *taz1*Δ, and *clr4*Δ) with the same configuration. Enrichment on *dgl* was normalized the signal obtained for the gene encoding actin (*act1+*). Enrichment at TM1 is reported as the percentage of immunoprecipitated chromatin (%IP). Error bars indicate S.D. from 3 biological replicates. Mean values marked with different letter (a, b or c) indicate results significantly different from each other, as established by One Way ANOVA and Holm-Sidak test for multiple comparison (P<0.01 in (A) and (B) or P<0.05 in (C)).
