# Supplementary material for: Telomeric Repeats Facilitate CENP-ACnp1 Incorporation via Telomere Binding Proteins
Source: PubMed Central journal article supplement (PMC3729655; doi:10.1371/journal.pone.0069673), 2013-07-31
Supplement: pone.0069673.s006.pdf [file pone.0069673.s006.pdf]

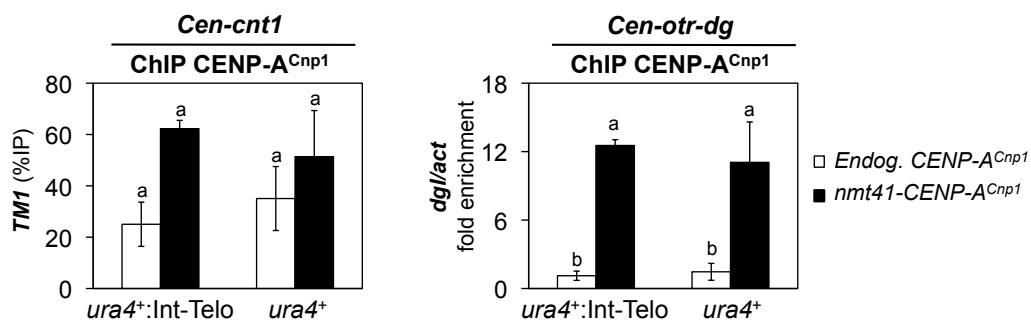

**Figure S6. Enrichment of CENP-A<sup>Cnp1</sup> at centromeres in cells with telomere repeats inserted at the *ura4+* locus**

ChIP-qPCR of CENP-A<sup>Cnp1</sup> levels at TM1 in the central region of centromere 1 (A) and centromeric otr *dgI* repeats (B) in cells containing an array of telomeric repeats integrated at the *ura4+* locus (*ura4+::Int-Telo*) or control cells (*ura4+*) and expressing endogenous (Endog. CENP-A<sup>Cnp1</sup>) or additional (*nmt41-CENP-A<sup>Cnp1</sup>*) levels of CENP-A<sup>Cnp1</sup>. Enrichment on *dgI* was normalized the signal obtained for the gene encoding actin (*act1+*). Enrichment at TM1 is reported as the percentage of immunoprecipitated chromatin (%IP). Error bars indicate S.D. from 3 biological replicates. Mean values marked with different letter (a or b) indicate results significantly different from each other, as established by One Way ANOVA and Holm-Sidak test for multiple comparison (P<0.01).
