# Supplementary material for: Telomeric Repeats Facilitate CENP-ACnp1 Incorporation via Telomere Binding Proteins
Source: PubMed Central journal article supplement (PMC3729655; doi:10.1371/journal.pone.0069673), 2013-07-31
Supplement: pone.0069673.s007.pdf [file pone.0069673.s007.pdf]

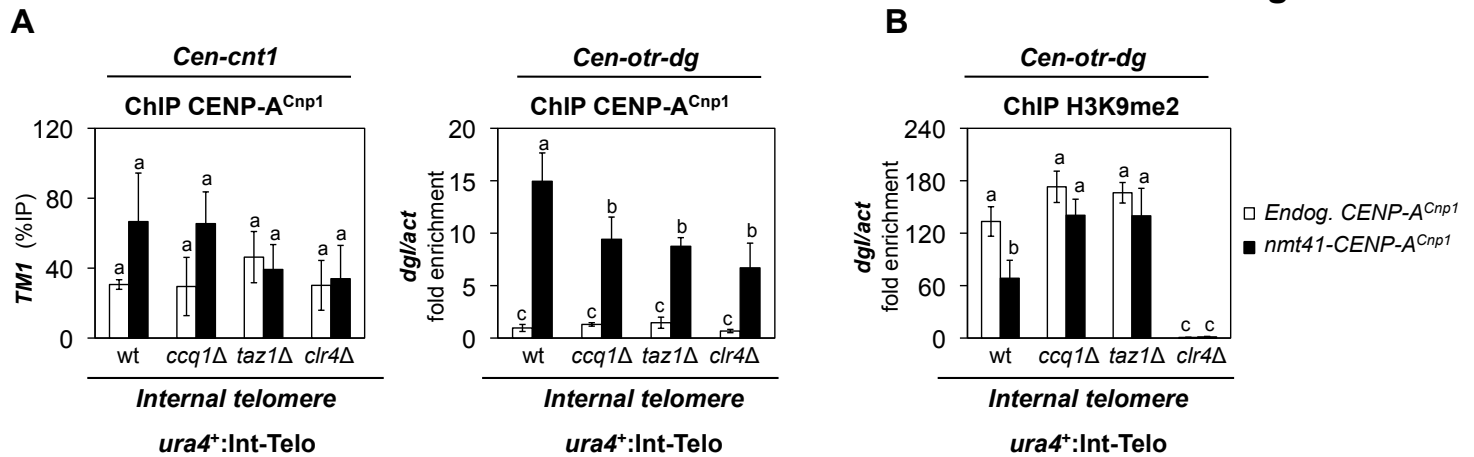

**Figure S7. Enrichment of CENP-A<sup>Cnp1</sup> and H3K9me2 at centromeres in wild-type cells and mutants that affect telomeric chromatin**

**(A)** ChIP-qPCR of CENP-A<sup>Cnp1</sup> levels at TM1 in the central region of centromere 1 and centromeric *otr dgI* repeats in wild-type (wt) and mutant cells (*ccq1Δ*, *taz1Δ*, and *clr4Δ*) which contain the internal telomere (*ura4<sup>+</sup>*:Int-Telo) and that express endogenous (Endog. CENP-A<sup>Cnp1</sup>) or additional (*nmt41-CENP-A<sup>Cnp1</sup>*) levels of CENP-A<sup>Cnp1</sup> **(B)** ChIP-qPCR of H3K9me2 levels in the same cell backgrounds. Enrichment at TM1 is reported as the percentage of immunoprecipitated chromatin (%IP). Enrichment on *dgI* was normalized the background signal obtained for the gene encoding actin (*act1+*). Error bars indicate S.D. from 3 biological replicates. Mean values marked with different letter (a, b or c) indicate results significantly different from each other, as established by One Way ANOVA and Holm-Sidak test for multiple comparison ( $P < 0.01$ ).
