# Supplementary material for: Telomeric Repeats Facilitate CENP-ACnp1 Incorporation via Telomere Binding Proteins
Source: PubMed Central journal article supplement (PMC3729655; doi:10.1371/journal.pone.0069673), 2013-07-31
Supplement: pone.0069673.s008.pdf [file pone.0069673.s008.pdf]

**Table S1. List of strains used in this study**

| <b>Strain</b> | <b>Genotype</b>                                                                                                                 | <b>Reference</b>    |
|---------------|---------------------------------------------------------------------------------------------------------------------------------|---------------------|
| 520           | <i>h+ leu1-32 ade6-210 ura4-DS/E [Ch16 ade6-216 m23::ura4-Tel (pEN72)]</i>                                                      | Nimmo et al., 1994  |
| 566           | <i>h+ leu1-32 ade6-210 ura4-DS/E [Ch16 ade6-216 m23::ura4-TAS-Tel (pEN76)]</i>                                                  | Nimmo et al., 1994  |
| 4133          | <i>h+ ade6-210 leu1-32 arg3-D4 his3-D1 ura4-DS/E</i>                                                                            |                     |
| 4134          | <i>h- ade6-210 leu1-32 arg3-D4 his3-D1 ura4-DS/E</i>                                                                            |                     |
| 10325         | <i>h- ars1(MluI)::pREP3X-leu2Sc leu1-32</i>                                                                                     |                     |
| 10328         | <i>h- ars1(MluI)::pREP81XCnp1-leu2Sc leu1-32</i>                                                                                |                     |
| 10332         | <i>h- ars1(MluI)::pREP41XCnp1-leu2Sc leu1-32</i>                                                                                |                     |
| 10336         | <i>h- ars1(MluI)::pREP3XCnp1-leu2Sc leu1-32</i>                                                                                 |                     |
| 11819         | <i>h- ars1(MluI)::pREP3X-leu2Sc [Ch16 ade6-216 m23::ura4-TAS-Tel (pEN76)] ade6-210 leu1-32 his3-D1 ura4-DS/E</i>                |                     |
| 11824         | <i>h- ars1(MluI)::pREP41XCnp1-leu2Sc [Ch16 ade6-216 m23::ura4-TAS-Tel (pEN76)] ade6-210 leu1-32 ura4-DS/E</i>                   |                     |
| 11825         | <i>h- ars1(MluI)::pREP3X-leu2Sc [Ch16 ade6-216 m23::ura4-Tel (pEN72)] ade6-210 leu1-32 his3-D1 ura4-DS/E</i>                    |                     |
| 11829         | <i>h- ars1(MluI)::pREP41XCnp1-leu2Sc [Ch16 ade6-216 m23::ura4-Tel (pEN72)] ade6-210 leu1-32 his3-D1 ura4-DS/E</i>               |                     |
| 13238         | <i>h- clr4Δ::nat ars1(MluI)::pREP3X-leu2Sc [Ch16 ade6-216 m23::ura4-Tel (pEN72)] ade6-210 ura4D-S/E leu1-32 *</i>               |                     |
| 13243         | <i>h- clr4Δ::nat ars1(MluI)::pREP41XCnp1-leu2Sc [Ch16 ade6-216 m23::ura4-Tel (pEN72)] ade6-210 ura4D-S/E leu1-32 *</i>          |                     |
| 13255         | <i>h- clr3Δ::kanMX6 ars1(MluI)::pREP3X-leu2Sc [Ch16 ade6-216 m23::ura4-Tel (pEN72)] ade6-210 ura4D-S/E leu1-32 *</i>            |                     |
| 13260         | <i>h- clr3Δ::kanMX6 ars1(MluI)::pREP41XCnp1-leu2Sc [Ch16 ade6-216 m23::ura4-Tel (pEN72)] ade6-210 ura4D-S/E leu1-32 *</i>       |                     |
| 18403         | <i>h+ taz1Δ::kanMX6</i>                                                                                                         | From J.P. Cooper    |
| 18406         | <i>h- ccq1Δ::hygMX6</i>                                                                                                         | Tomita&Cooper. 2008 |
| 18405         | <i>h+ ura4:telo ade6-210 his3-D1 leu1-32</i>                                                                                    | Miller et al 2006   |
| 18500         | <i>h+ rif1Δ::hygMX6 ade6-216 leu1-32 ura4-D18 his3-D1</i>                                                                       | From J.P. Cooper    |
| 18559         | <i>h- taz1Δ::kanMX6 ars1(MluI)::pREP3X-leu2Sc [Ch16 ade6-216 m23::ura4-Tel (pEN72)] ade6-210 leu1-32 ura4-DS/E *</i>            |                     |
| 18563         | <i>h- taz1Δ::kanMX6 ars1(MluI)::pREP41XCnp1-leu2Sc [Ch16 ade6-216 m23::ura4-Tel (pEN72)] leu1-32 ade6-210 ura4-DS/E *</i>       |                     |
| 18567         | <i>h- ccq1Δ::hygMX6 ars1(MluI)::pREP3X-leu2Sc [Ch16 ade6-216 m23::ura4-Tel (pEN72)] leu1-32 ade6-210 ura4-DS/E *</i>            |                     |
| 18569         | <i>h- ccq1Δ::hygMX6 ars1(MluI)::pREP41XCnp1-leu2Sc [Ch16 ade6-216 m23::ura4-Tel (pEN72)] leu1-32 ade6-210 ura4-DS/E *</i>       |                     |
| 18571         | <i>h- rif1Δ::hygMX6 ars1(MluI)::pREP3X-leu2Sc [Ch16 ade6-216 m23::ura4-Tel (pEN72)] leu1-32 ade6-210 ura4-DS/E his3-D1</i>      |                     |
| 18574         | <i>h- rif1Δ::hygMX6 ars1(MluI)::pREP41XCnp1-leu2Sc [Ch16 ade6-216 m23::ura4-Tel (pEN72)] leu1-32 ade6-210 ura4-DS/E his3-D1</i> |                     |
| 18596         | <i>h- ura4:telo ars1(MluI)::pREP3X-leu2Sc leu1-32 ade6-210 *</i>                                                                |                     |
| 18605         | <i>h- ura4:telo ars1(MluI)::pREP41XCnp1-leu2Sc leu1-32 *</i>                                                                    |                     |
| 18663         | <i>h- ura4:telo taz1Δ::kanMX6 ars1(MluI)::pREP3X-leu2Sc leu1-32 ade6-210 *</i>                                                  |                     |
| 18664         | <i>h- ura4:telo taz1Δ::kanMX6 ars1(MluI)::pREP41XCnp1-leu2Sc leu1-32 *</i>                                                      |                     |
| 18671         | <i>h- ura4:telo ccq1Δ::hygMX6 ars1(MluI)::pREP3X-leu2Sc leu1-32 ade6-210 *</i>                                                  |                     |
| 18675         | <i>h- ura4:telo ccq1Δ::hygMX6 ars1(MluI)::pREP41XCnp1-leu2Sc leu1-32 *</i>                                                      |                     |
| 18685         | <i>h- ura4:telo clr4Δ::nat ars1(MluI)::pREP3X-leu2Sc leu1-32 ade6-210 *</i>                                                     |                     |
| 18687         | <i>h- ura4:telo clr4Δ::nat ars1(MluI)::pREP41XCnp1-leu2Sc leu1-32 *</i>                                                         |                     |

\* only relevant genotype is shown
