# Supplementary material for: Telomeric Repeats Facilitate CENP-ACnp1 Incorporation via Telomere Binding Proteins
Source: PubMed Central journal article supplement (PMC3729655; doi:10.1371/journal.pone.0069673), 2013-07-31
Supplement: pone.0069673.s009.pdf [file pone.0069673.s009.pdf]

**Table S2. Primers used for qPCR**

| <b>Primer name</b> | <b>Locus</b>                          | <b>Sequence (5'-3')</b>     |
|--------------------|---------------------------------------|-----------------------------|
| q-cnt1-F           | <i>TM1</i>                            | CAGACAATCGCATGGTACTATC      |
| q-cnt1-R           | <i>TM1</i>                            | AGGTGAAGCGTAAGTGAGTG        |
| q-dgl-F            | <i>dgl</i>                            | AATTGTGGTGGTGTGGTAATAC      |
| q-dgl-R            | <i>dgl</i>                            | GGGTTCATCGTTTCCATT CAG      |
| q-act1-f           | <i>act1</i> <sup>+</sup>              | CCCAAATCCAACCGTGAGAAAGATG   |
| q-act1-r           | <i>act1</i> <sup>+</sup>              | CCAGAGTCCAAGACGATACCAGTG    |
| q-ura4-f2          | <i>ura4</i> <sup>+</sup>              | AGGCTCTTTGGCTACTGGTTCC      |
| q-ura4-r2          | <i>ura4</i> <sup>+</sup>              | AGTTATGTAGTCGCTTTGAAGGTTAGG |
| q-tel1R-f          | Ch I, right arm, subtelomeric (53 kb) | AACGATGAACCTTTTTCTTATCCG    |
| q-tel1R-r          | Ch I, right arm, subtelomeric (53 kb) | AAAGGATTAACGCCTTTCCTCG      |
