# Supplementary material for: Telomeric Repeats Facilitate CENP-ACnp1 Incorporation via Telomere Binding Proteins
Source: PubMed Central journal article supplement (PMC3729655; doi:10.1371/journal.pone.0069673), 2013-07-31
Supplement: pone.0069673.s010.pdf [file pone.0069673.s010.pdf]

**Table S3. Primers used for multiplex PCR**

| <b>Primer name</b> | <b>Location</b>          | <b>Distance from distal end</b> | <b>Sequence (5'-3')</b> |
|--------------------|--------------------------|---------------------------------|-------------------------|
| AGC34              | Ch I, right arm          | 21.7 kb                         | TTCTACAATTAGCTGAACCC    |
| AGC35              | Ch I, right arm          | 21.7 kb                         | TAATGGCTTCAATAATTGGC    |
| AGC32              | Ch I, right arm          | 53 kb                           | ATGAACCTTTTTCTTATCCG    |
| AGC33              | Ch I, right arm          | 53 kb                           | CGGTATTTGTTTTAAGTACG    |
| AGC38              | Ch I, right arm          | 72 kb                           | CATTAAGAAAAACCACTACAG   |
| AGC39              | Ch I, right arm          | 72 kb                           | TGCTGAACTTCATAAAATCGG   |
| AGC60              | Ch II, right arm         | 3.7 kb                          | TTAAAAAAGTTAAGGGTAGG    |
| AGC61              | Ch II, right arm         | 3.7 kb                          | CTTTTTCTCTATTTGTTTCATC  |
| AGC40              | Ch II, right arm         | 47.9 kb                         | CCCTTAATTTAAATACGAGGC   |
| AGC41              | Ch II, right arm         | 47.9 kb                         | CAGTATTAATATGCAAGCGC    |
| AGC46              | Ch III, left arm         | 34.5 kb                         | CACATGGAAATGAAAATAAGCG  |
| AGC47              | Ch III, left arm         | 34.5 kb                         | AACATCTTCACAACTGCTACC   |
| act-for            | <i>act1</i> <sup>+</sup> | -----                           | GGCATCACACTTTCTACAACG   |
| act-rev            | <i>act1</i> <sup>+</sup> | -----                           | GAGTCCAAGACGATACCAGTG   |
